# Supplementary material for: A combined AIMD and DFT study of the low-energy radiation responses of GaN
Source: Royal Society of Chemistry journal article supplement (doi:10.1039/d4cp00426d), 2024-01-01

## **Supporting Information**

### **A combined AIMD and DFT study of the low energy radiation responses of GaN**

Ming Jiang<sup>1,\*</sup>, Nuo Cheng<sup>2</sup>, Xin-Yu Zhu<sup>2</sup>, Xuan-Liang Hu<sup>3</sup>, Zi-Han Wang<sup>3</sup>, Ning Liu<sup>3</sup>,  
Shuo Song<sup>3</sup>, Sheng-Ze Wang<sup>3</sup>, Xu-Sheng Liu<sup>4,\*</sup>, Chandra Veer Singh<sup>5,6,\*</sup>

<sup>1</sup>Institutes of Physical Science and Information Technology, Anhui University, Hefei  
230601, China

<sup>2</sup>School of Materials Science and Engineering, Anhui University, Hefei, 230601,  
China

<sup>3</sup>Stony Brook Institute at Anhui University, Anhui University, Hefei 230601, China

<sup>4</sup>College of Physics and Engineering Technology, Chengdu Normal University,  
Chengdu 611130, China

<sup>5</sup>Department of Materials Science and Engineering, University of Toronto, 184  
College Street, Suite 140, Toronto, ON M5S 3E4, Canada

<sup>6</sup>Department of Mechanical and Industrial Engineering, University of Toronto, 5  
King's College Road, Toronto, ON M5S 3G8, Canada

**Table S1.** Lattice parameters of bulk Ga and N<sub>2</sub>.

| Materials Projected ID |        | Space Group               | a(Å) | b(Å) | c(Å) |
|------------------------|--------|---------------------------|------|------|------|
| GaN                    | mp-142 | Cmce                      | 4.41 | 7.84 | 4.54 |
| N <sub>2</sub>         | mp-154 | <i>P</i> 2 <sub>1</sub> 3 | 5.56 | 5.56 | 5.56 |

**Table S2.** Defect formation energy (eV) in GaN as a function of supercell size.

|                          | $2 \times 2 \times 1$ (16) | $2 \times 2 \times 2$ (32) | $3 \times 3 \times 2$ (72) | $3 \times 3 \times 3$ (108) | $3 \times 3 \times 4$ (144) |
|--------------------------|----------------------------|----------------------------|----------------------------|-----------------------------|-----------------------------|
| $V_{\text{Ga}}$          | 6.50                       | 6.47                       | 6.34                       | 6.34                        | 6.33                        |
| $V_{\text{N}}$           | 3.03                       | 3.02                       | 2.95                       | 2.90                        | 2.92                        |
| $\text{Ga}_{\text{int}}$ | 8.74                       | 8.58                       | 8.47                       | 8.51                        | 8.42                        |
| $\text{N}_{\text{int}}$  | 4.07                       | 4.01                       | 3.91                       | 3.87                        | 3.85                        |
| $\text{Ga}_{\text{N}}$   | 5.91                       | 5.91                       | 5.80                       | 5.79                        | 5.77                        |
| $\text{N}_{\text{Ga}}$   | 6.98                       | 6.84                       | 6.71                       | 6.67                        | 6.62                        |

**Table S3** Lattice parameters of pristine and defective GaN.

|            | $a$ (Å)     | $c$ (Å) | $V$    |
|------------|-------------|---------|--------|
| Pristine   | 9.69        | 10.50   | 853.82 |
| $V_N$      | 9.68        | 10.50   | 852.07 |
| $V_{Ga}$   | 9.65        | 10.49   | 845.98 |
| $N_{int}$  | 9.78 (9.74) | 10.54   | 866.44 |
| $Ga_{int}$ | 9.72 (9.85) | 10.60   | 878.68 |
| $N_{Ga}$   | 9.68        | 10.49   | 851.25 |
| $Ga_N$     | 9.74        | 10.62   | 871.75 |

**Figure S1.** Illustration of point defects at the end of Ga recoil events. The blue and grey spheres represent the Ga and N atoms, respectively. The red and yellow spheres represent the vacancy and interstitial defects.

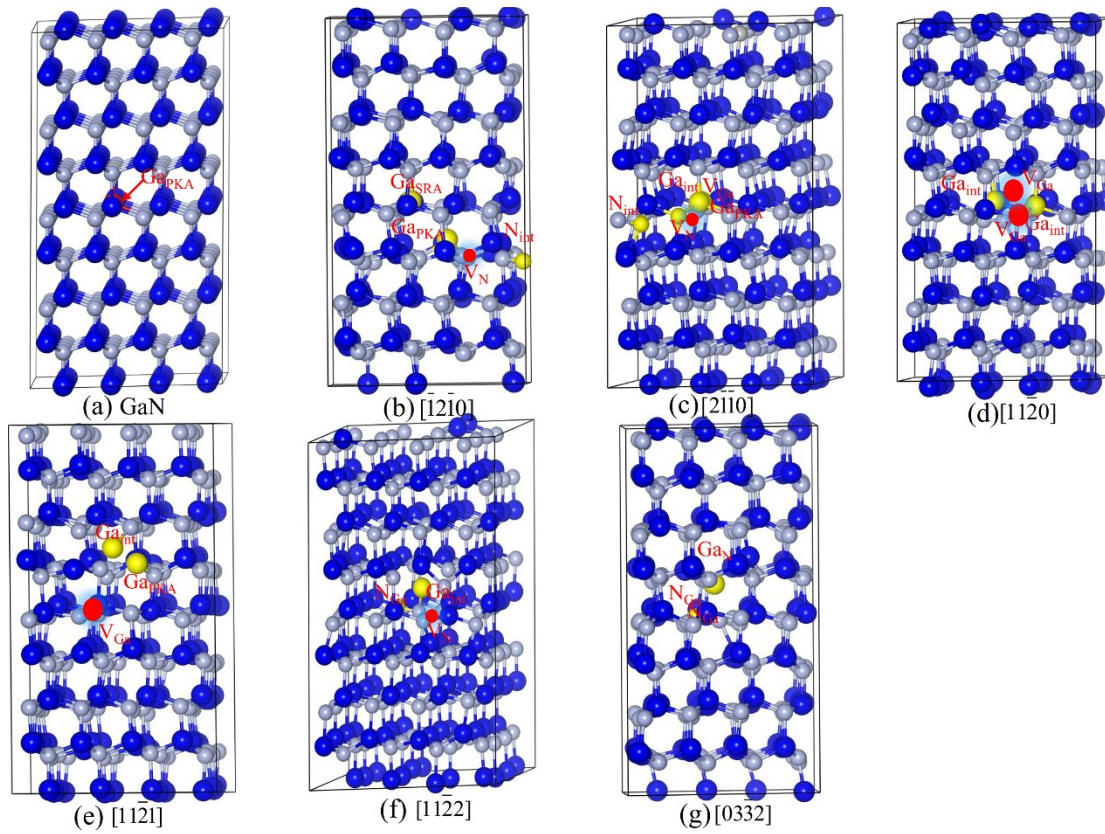

**Figure S2.** Illustration of point defects at the end of N recoil events. The blue and grey spheres represent the Ga and N atoms, respectively. The red and yellow spheres represent the vacancy and interstitial defects.

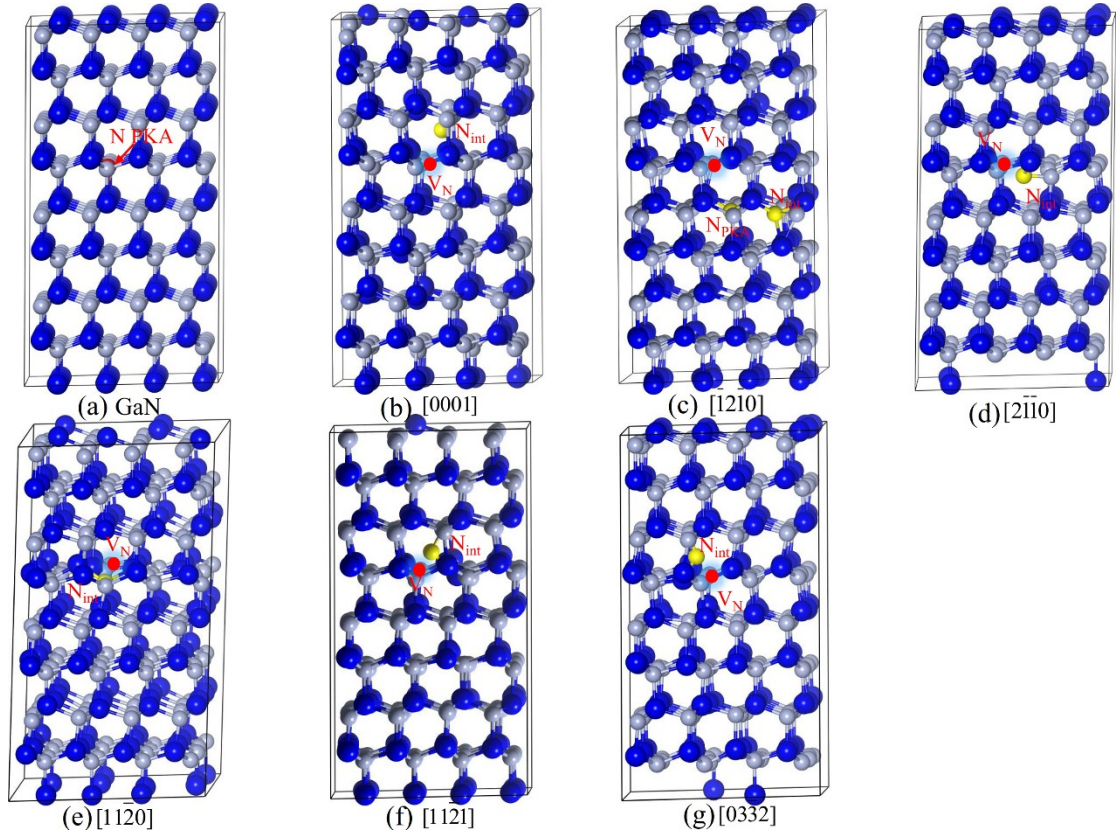

**Figure S3.** Variation of system temperature for GaN during the Ga recoil events.

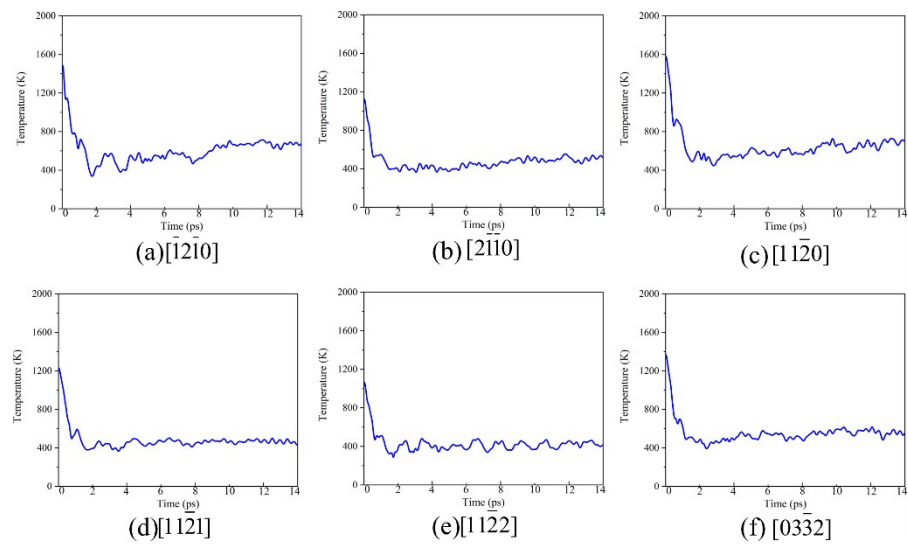

**Figure S4.** Variation of system temperature for GaN during the N recoil events.

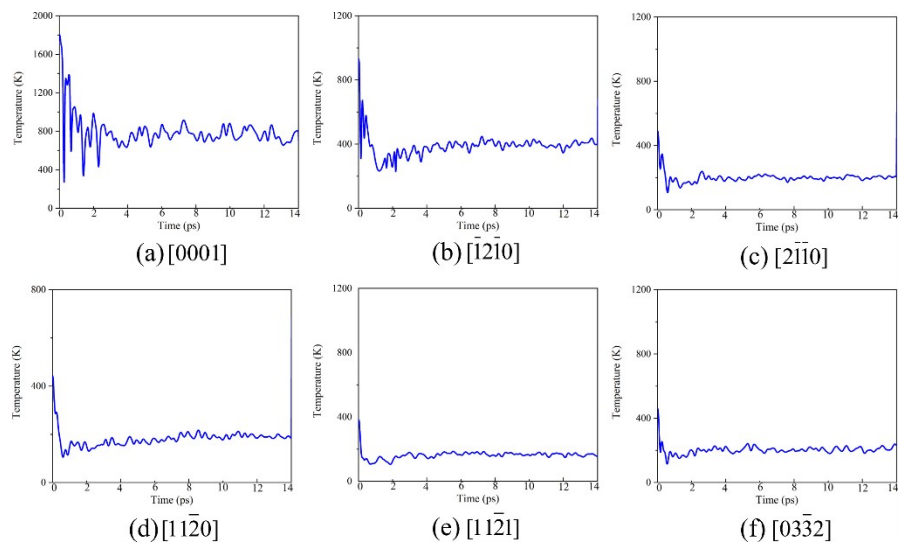

Supplement: d4cp00426d1.pdf [file d4cp00426d1.pdf]
